# Supplementary material
Source: PubMed Central journal article supplement (PMC10154999)
Supplement: NIHMS1891277-supplement-Supp_Figures.pdf [file NIHMS1891277-supplement-Supp_Figures.pdf]

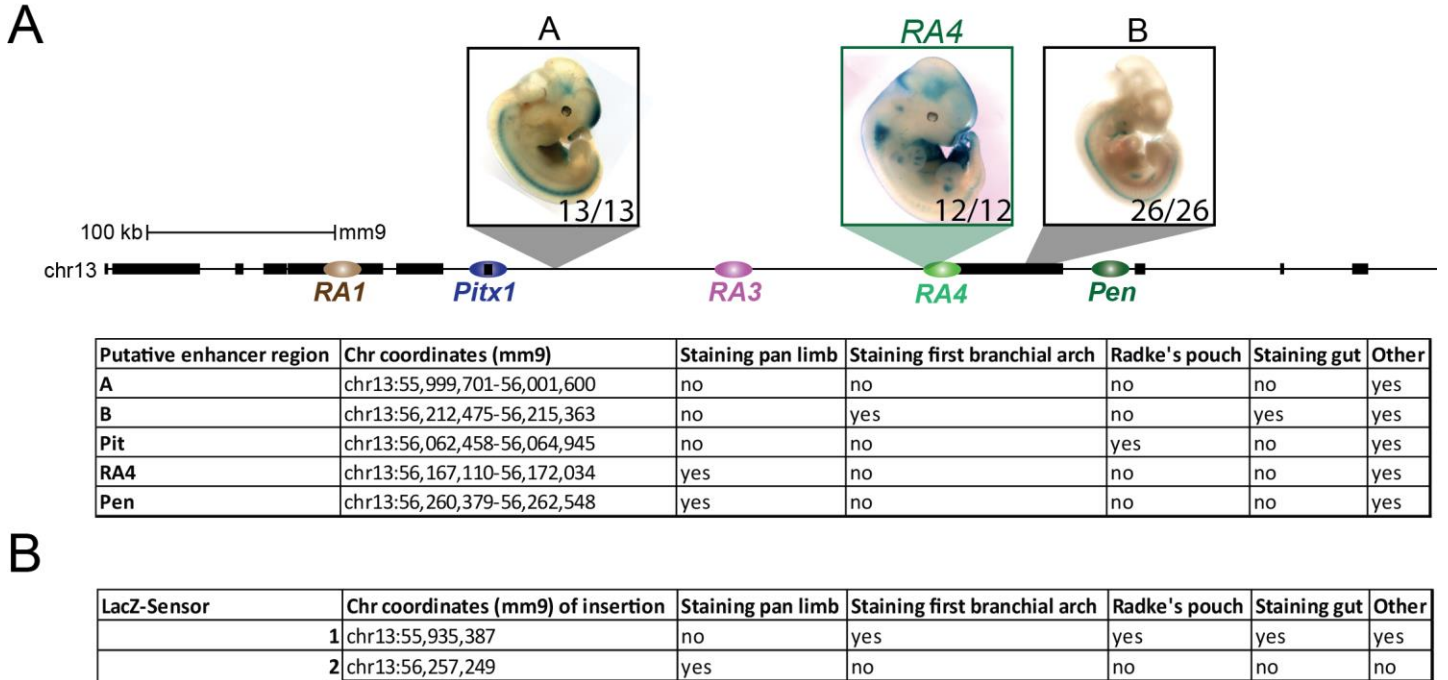

### Supplementary Figure 1

#### Probing the regulatory sequences and activities of the *Pitx1* locus.

**a**, Table listing putative enhancer regions tested by *lacZ* reporter assay. Above is the *lacZ* reporter activity in E11.5 embryos. Numbers represent the number of embryos displaying the staining shown in the table. **b**, Table listing the genomic location of *lacZ* sensors 1 and 2 at the *Pitx1* locus (mm9) and *lacZ* reporter staining in E11.5 embryos.

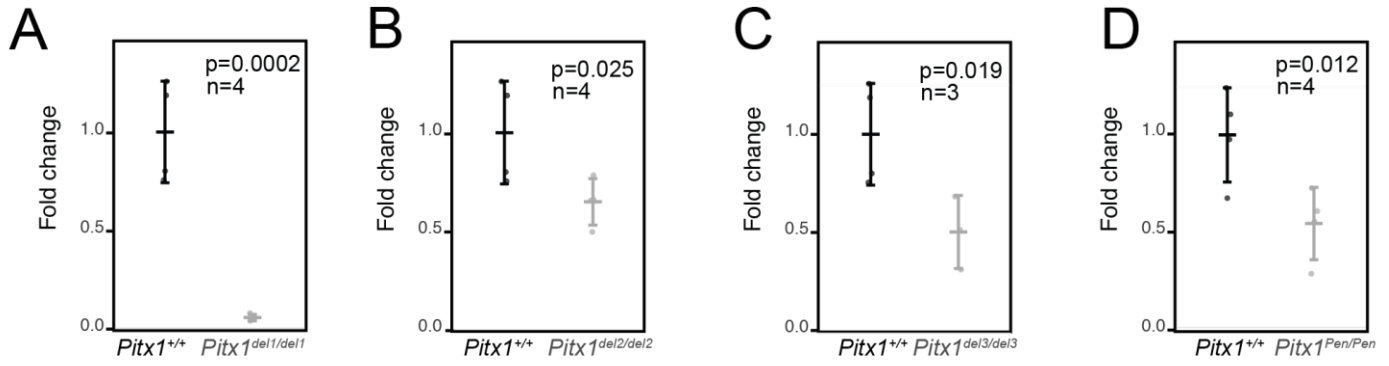

## Supplementary Figure 2

### Quantification of *Pitx1* hindlimb transcription in several deletion mice.

In all analyses, we used a one-sided *t* test to evaluate the significance of the decrease in *Pitx1* expression and *n* represents the number of wild-type and mutant hindlimb pairs assayed. The s.d. is displayed as error bars and the measure of the center corresponds to the average. **a**, qRT-PCR mRNA quantification of E11.5 *Pitx1*<sup>del1/del1</sup> hindlimbs ( $P = 0.0002$ ,  $n = 4$ ). **b**, qRT-PCR mRNA quantification of E11.5 *Pitx1*<sup>del2/del2</sup> hindlimbs ( $P = 0.025$ ,  $n = 4$ ). **c**, qRT-PCR mRNA quantification of E11.5 *Pitx1*<sup>del3/del3</sup> hindlimbs ( $P = 0.019$ ,  $n = 3$ ). **d**, qRT-PCR mRNA quantification of E11.5 *Pitx1*<sup>Pen/Pen</sup> hindlimbs ( $P = 0.012$ ,  $n = 4$ ).

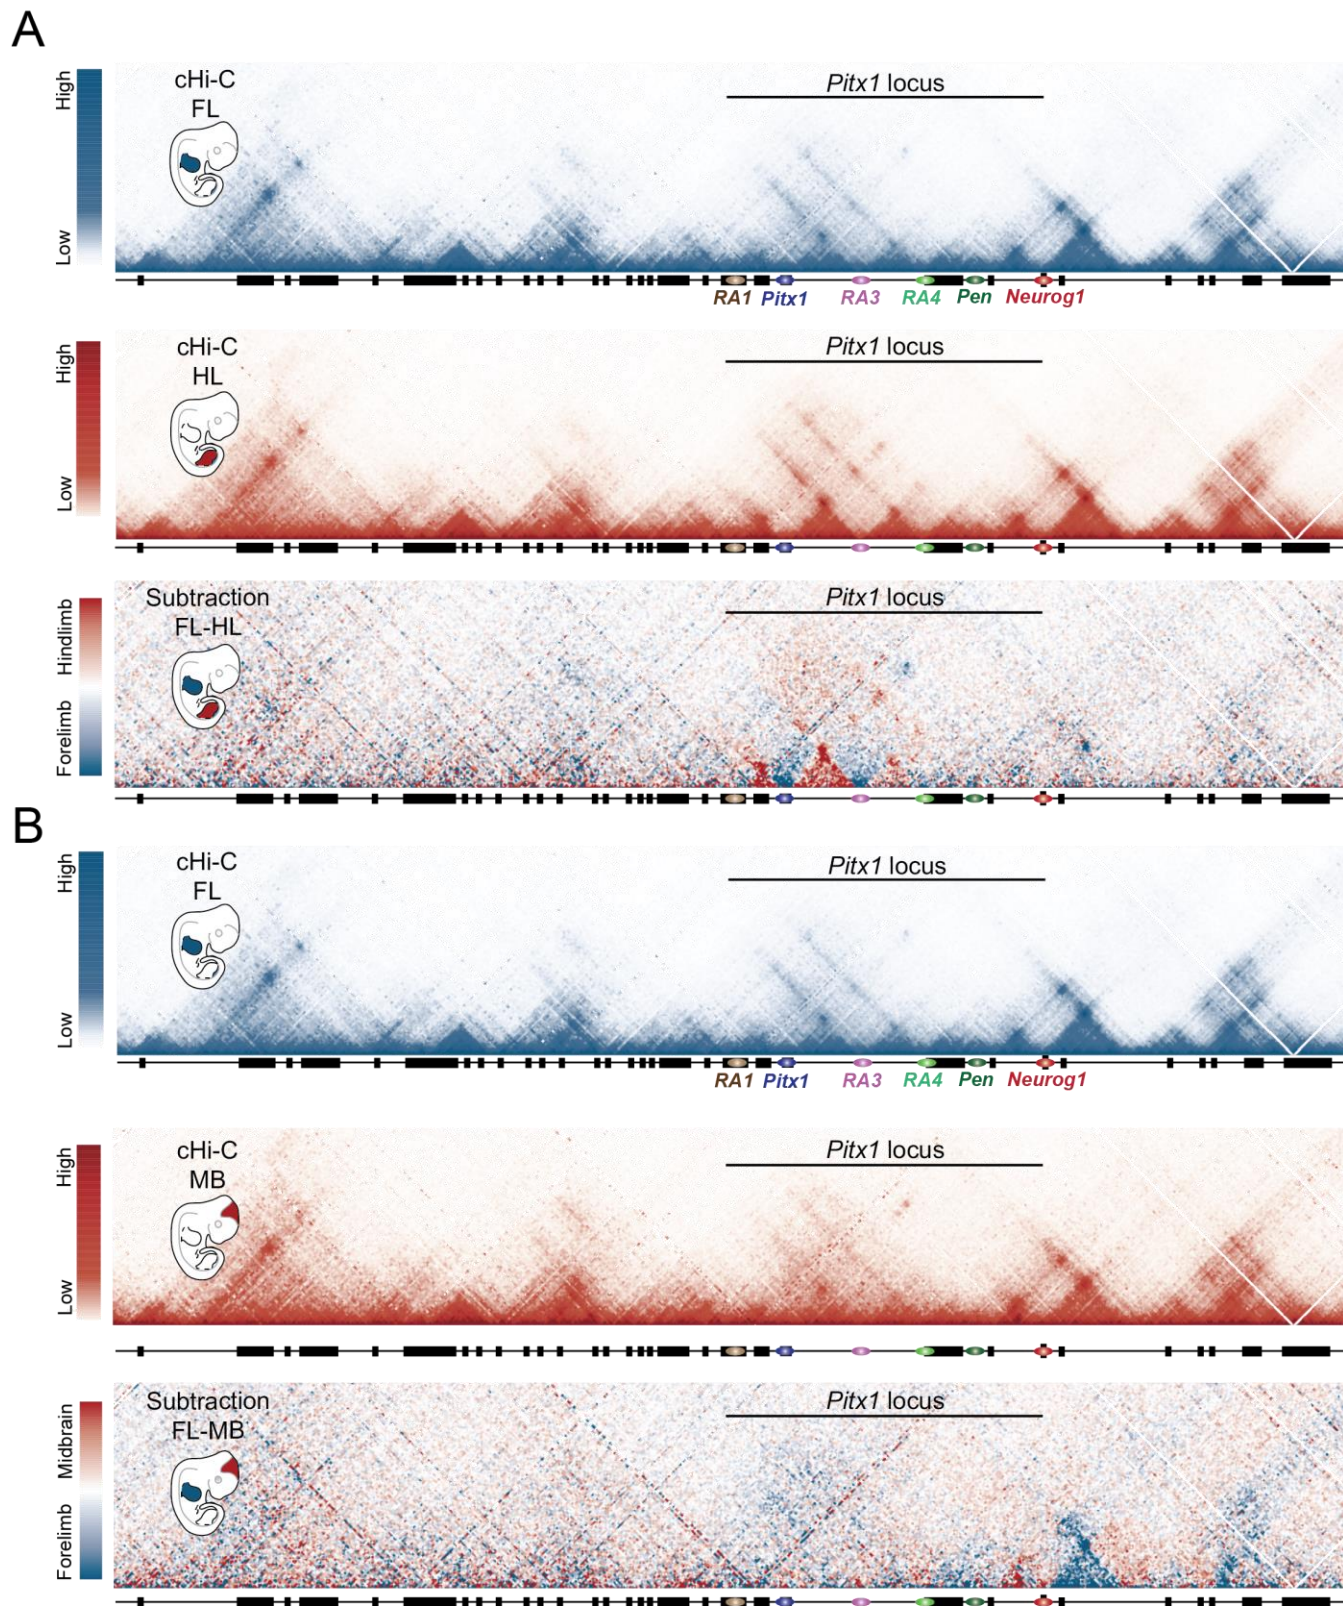

### Supplementary Figure 3

cHi-C of the extended *Pitx1* locus in wild-type forelimb, hindlimb and midbrain tissues.

**a**, cHi-C interaction map in E11.5 forelimb (blue) and hindlimb (red) tissues over a 3-Mb captured region. Bottom, subtraction of hindlimb and forelimb cHi-C whereby blue indicates a higher chromatin interaction frequency in forelimb and red a higher interaction frequency in hindlimb as compared to each other. Note that only the *Pitx1* locus displays clear changes in chromatin interactions within the entire captured region. **b**, cHi-C interaction map in E11.5 forelimb (blue) and E10.5 midbrain (red) tissues over a 3-Mb captured region. Bottom, subtraction of midbrain and forelimb cHi-C whereby blue indicates a higher chromatin interaction frequency in forelimb and red a higher interaction frequency in midbrain as compared to each other. Note the absence of chromatin interaction changes at the *Pitx1* locus, in contrast to the neighboring telomeric domain (see blue domain in subtraction map), which include *Cxcl14*, a gene transcriptionally repressed in midbrain and active in forelimb.

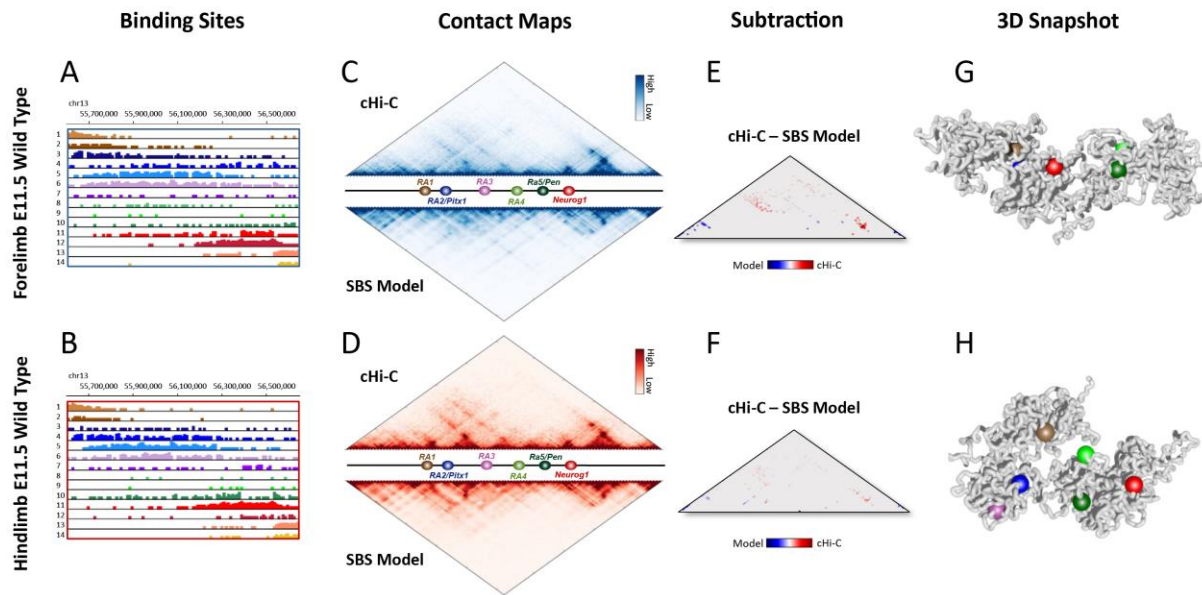

## Supplementary Figure 4

### Modeling of the *Pitx1* locus 3D architecture in wild-type forelimb and hindlimb.

**a,b**, Histograms displaying the position and abundance of 14 different types of binding sites (Methods) along the genome, in forelimbs (top) and hindlimbs (bottom) as derived from the E11.5 cHi-C data. Each binding site is displayed with a different color. **c,d**, Contact maps derived from cHi-C (above) and SBS model (below) display high similarity. The Pearson correlation,  $r$ , and the genomic-distance-corrected Pearson correlation,  $r'$ , between the cHi-C and SBS matrices ( $105 \text{ bins} \times 105 \text{ bins} = 11,025$ ) are  $r = 0.98$  and  $r' = 0.84$  in forelimb and  $r = 0.98$  and  $r' = 0.82$  in hindlimb. **e,f**, Subtraction matrices between cHi-C and SBS model in wild-type forelimbs (top) and hindlimbs (bottom). Differences above random background are shown in red and blue. **g,h**, A representative 3D structure of the locus in forelimb (top) and hindlimb (bottom), selected from the ensemble of 'single-cell' model-derived conformations (Methods). In Fig. 4d,e, the corresponding coarse-grained versions are shown to highlight the position of genes and regulators.

# Subtraction WT FL-HL

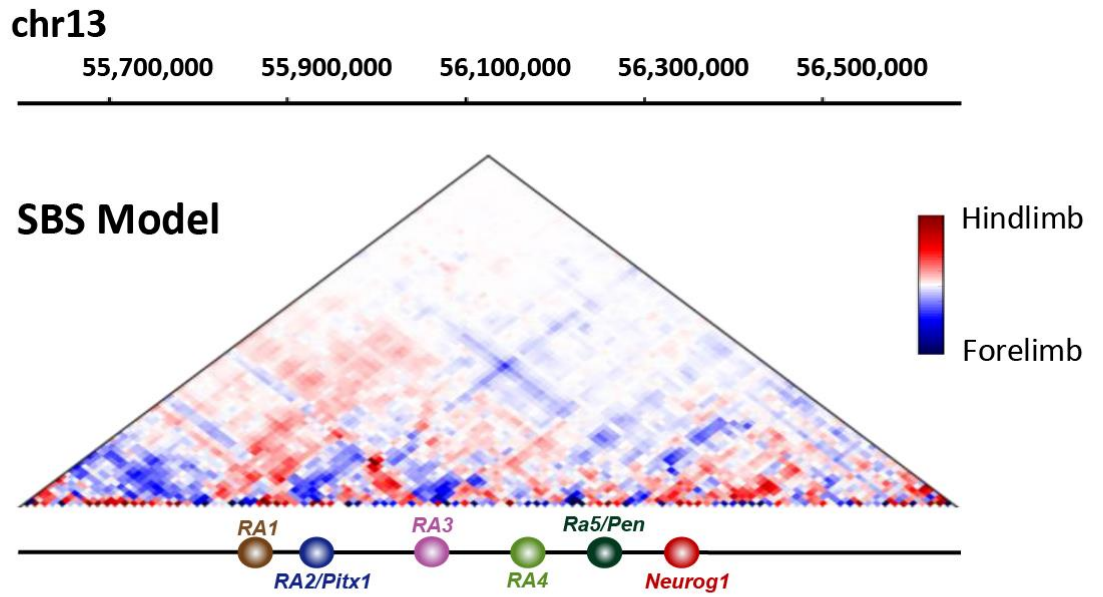

## Supplementary Figure 5

Subtraction matrix between the SBS models of wild-type forelimb and hindlimb.

The corresponding chi-C data are shown in Fig. 4c.

### Average Relative Distance Changes

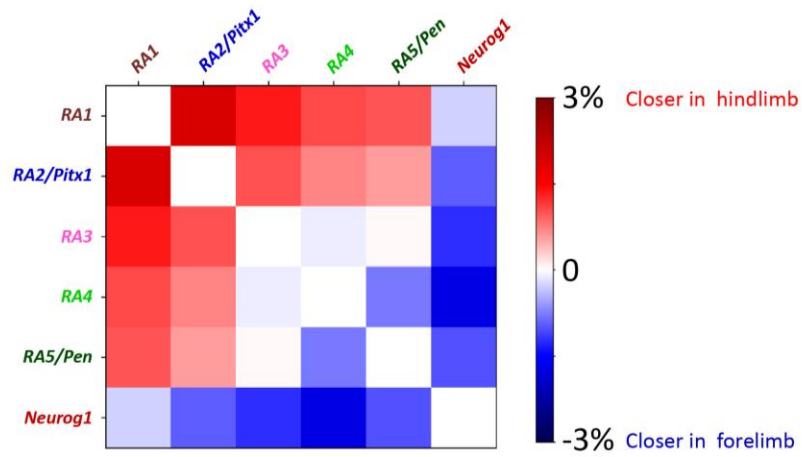

### Supplementary Figure 6

Relative changes in physical distances between wild-type forelimb and hindlimb 3D structure.

Heat map showing relative changes in physical distances between forelimb and hindlimb 3D structure as measured by the polymer model.

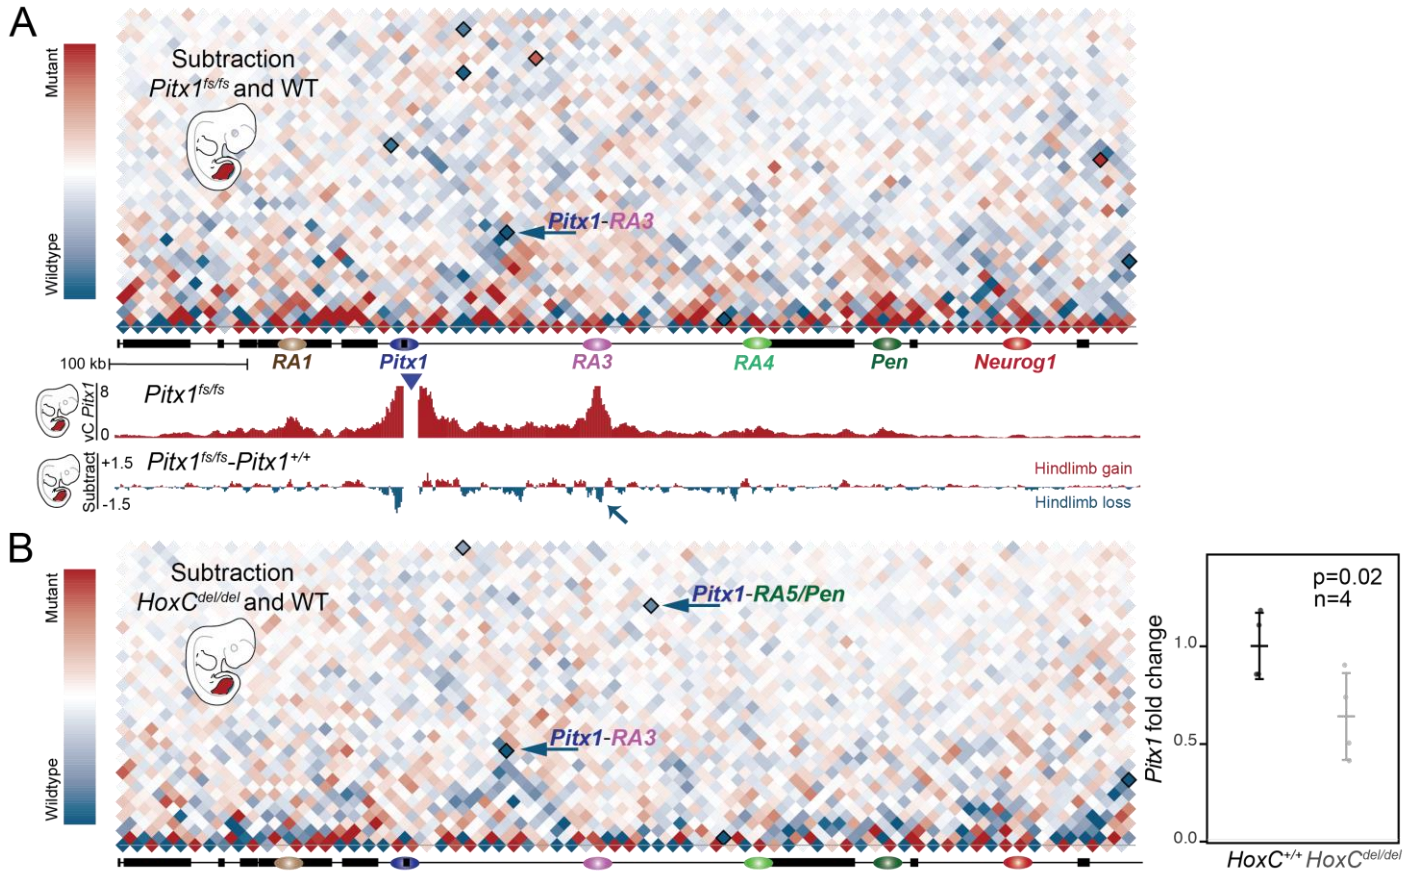

## Supplementary Figure 7

### Effect of *Pitx1* and *HoxC* loss of function on the 3D structure of the *Pitx1* locus in hindlimbs.

**a**, cHi-C subtraction between wild-type and *Pitx1<sup>fs/fs</sup>* mutant hindlimb tissue at E11.5. Chromatin interactions more prevalent in mutant or wild-type hindlimb tissues are shown in red and blue, respectively. Significant changes in interactions are highlighted in black boxes (FDR = 0.05). Interactions significantly reduced between regulatory anchors are indicated with a blue arrow (*Pitx1-RA3* interaction). Derived viewpoint from cHi-C map, vC, using the *Pitx1* viewpoint is shown in red. Below is the subtraction track between wild-type and mutant hindlimb tissues using the respective viewpoint. **b**, cHi-C subtraction between wild-type and *HoxC<sup>del/del</sup>* mutant hindlimb tissues at E11.5. Chromatin interactions more prevalent in mutant or wild-type hindlimb tissues are shown in red and blue, respectively. Significant changes are highlighted in black boxes (FDR = 0.05). Interactions significantly reduced between regulatory anchors are indicated with blue arrows (*Pitx1-RA3* and *Pitx1-Pen*). qRT-PCR quantification of *Pitx1* in *HoxC<sup>del/del</sup>* mutant hindlimb tissues at E11.5 showed an average 36% reduction. (We used a one-sided *t* test to evaluate the significance of decrease in *Pitx1* expression and found  $P = 0.02$ ;  $n = 4$  wild-type and mutant hindlimb pairs; s.d. is displayed as error bars; the measure of the center is the average of the data points.)



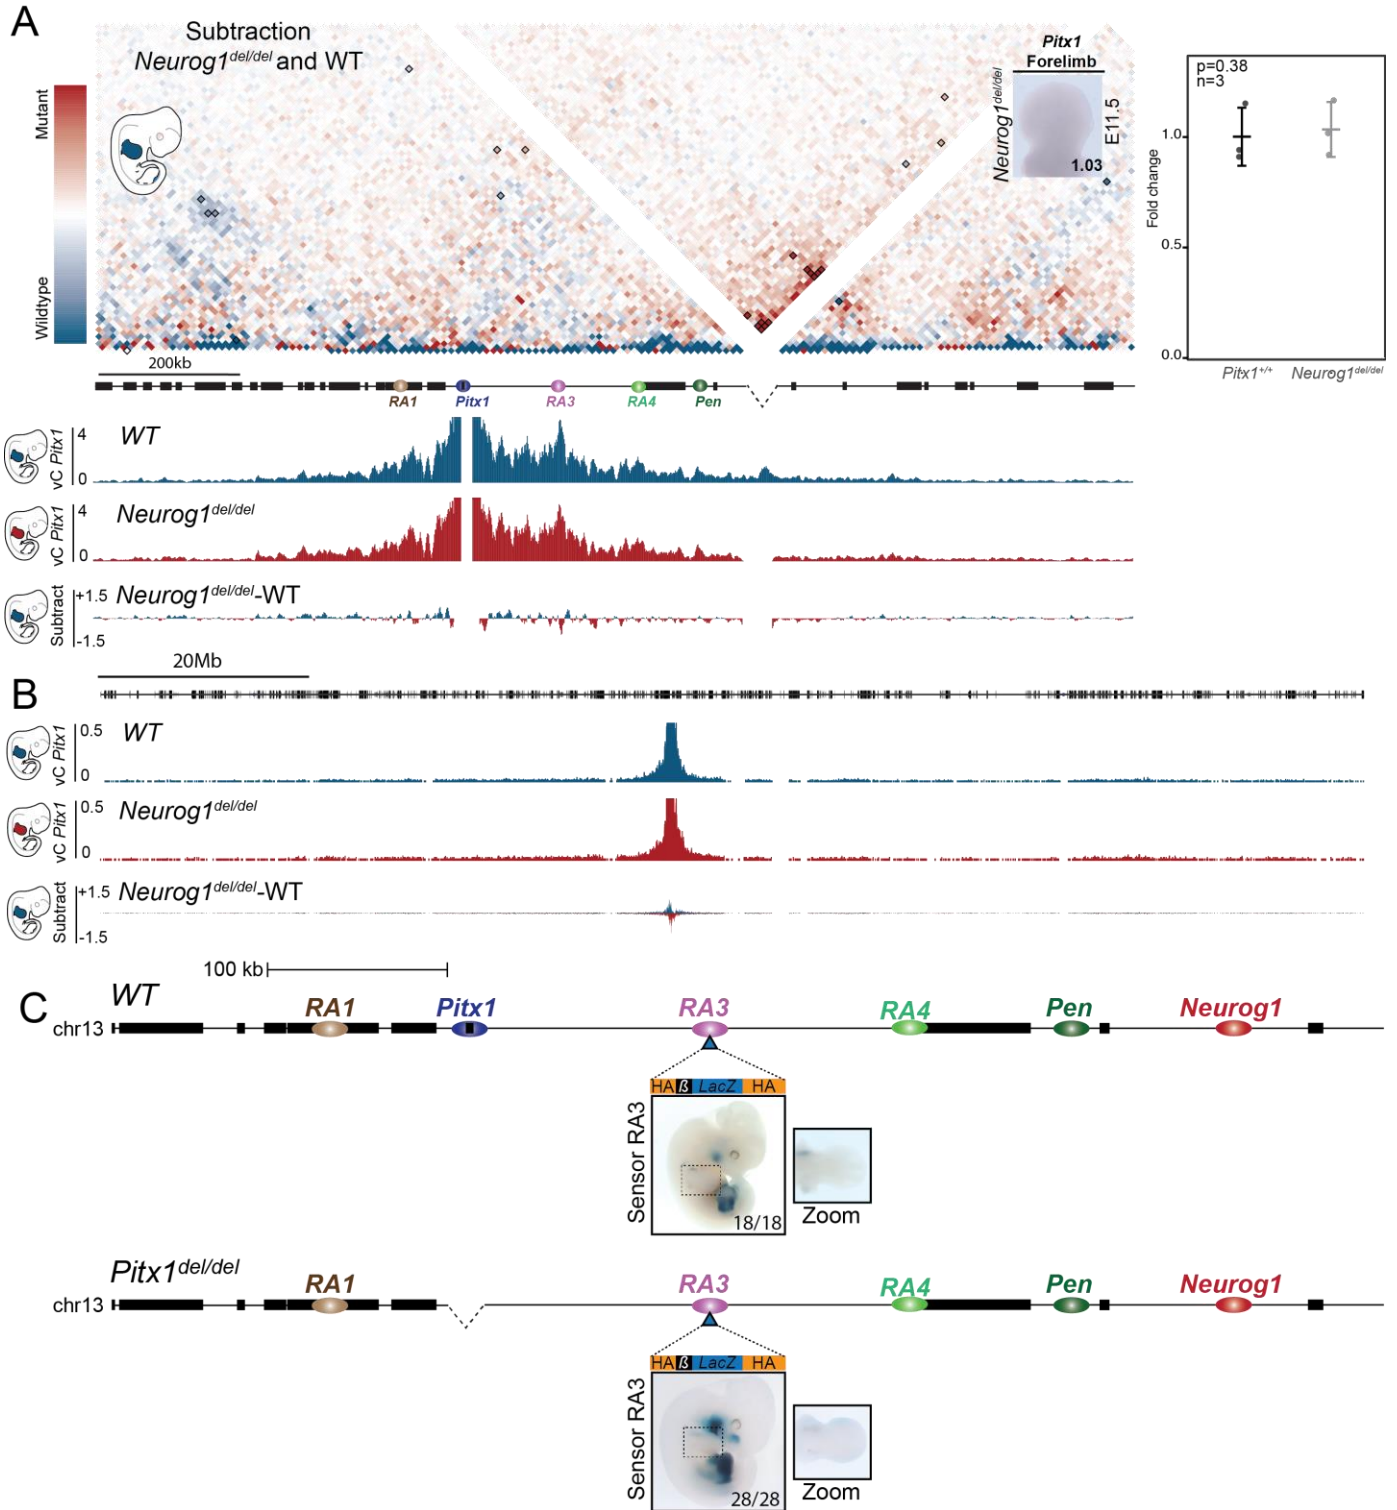

## Supplementary Figure 8

Deletions of the *Pitx1* or *Neurog1* H3K27me3 domains are not sufficient to perturb the hindlimb-restricted regulatory activity of the locus.

a, cHi-C subtraction between wild-type and *Neurog1<sup>del/del</sup>* mutant forelimb tissue at E11.5. Chromatin interactions more prevalent in mutant or wild-type forelimb tissues are shown in red and blue, respectively. Significant changes are highlighted in black boxes (FDR =

0.05). Right, *Neurog1*<sup>del/del</sup> embryos do not show changes in *Pitx1* expression in E11.5 forelimbs as seen in WISH (photo) and quantified by qRT-PCR. (We used a one-sided *t* test to evaluate the significance of increased *Pitx1* expression and found  $P = 0.38$ ;  $n = 3$  wild-type and mutant limb pairs; the center is the average and the s.d. is displayed by the error bars.) Below, derived vC from the *Pitx1* viewpoint in wild-type and *Neurog1*<sup>del/del</sup> forelimbs are shown in blue and red, respectively. Below is the subtraction track between wild-type and mutant forelimb tissue using the respective viewpoint. **b**, Whole chromosome 13 view of vC from the *Pitx1* viewpoint. Note that these profiles display the genomic region enriched in cHi-C as well as the non-enriched part of the chromosome. **c**, Staining of embryos with a *lacZ* sensor integrated in the *RA3* region. Wild-type (top) and *Pitx1*<sup>del/del</sup> (bottom) staining display no obvious difference between fore- and hindlimb. Eighteen of 18 embryos displayed the same staining in the wild-type background, and 28 of 28 displayed the same staining in the *Pitx1*<sup>del/del</sup> background.

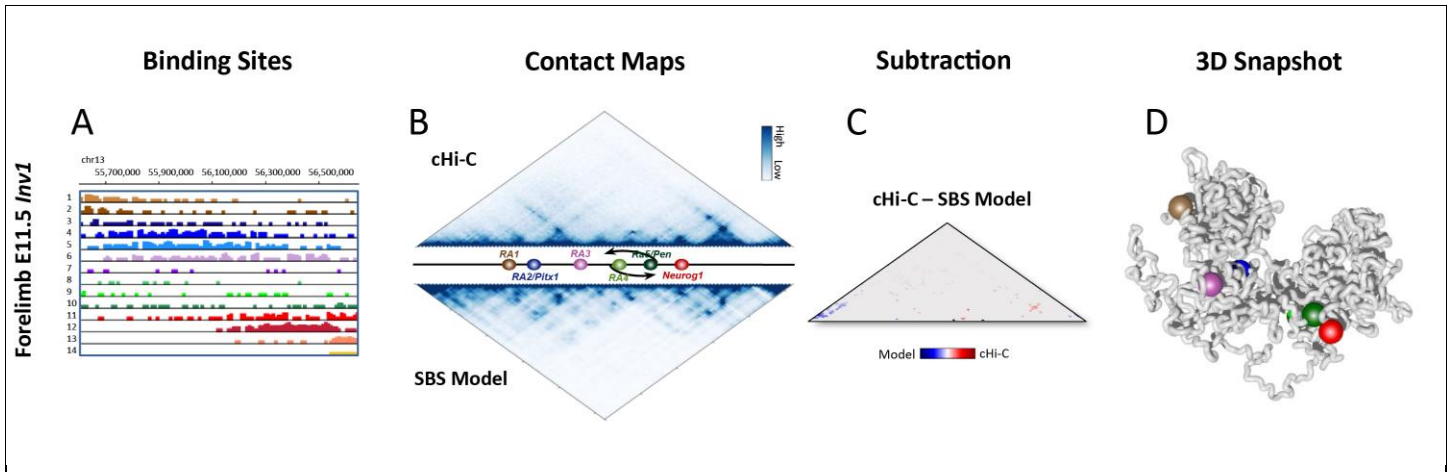

## Supplementary Figure 9

### Modeling of the *Pitx1* locus 3D architecture in *Pitx1*<sup>inv1/inv1</sup> forelimbs.

**a**, Histograms displaying the position and abundance of 14 different types of binding sites (Methods) along the genome, in *Pitx1*<sup>inv1/inv1</sup> forelimbs at E11.5. As in Supplementary Fig. 4a,b, each binding site is displayed with a different color. **b**, Contact maps derived from cHi-C (above) and SBS model (below) display high similarity. The Pearson correlation,  $r$ , and the genomic-distance-corrected Pearson correlation,  $r'$ , between the cHi-C and SBS matrices (105 bins \* 105 bins = 11,025) are  $r = 0.97$  and  $r' = 0.74$ . **c**, Subtraction matrix between cHi-C and SBS model in *Pitx1*<sup>inv1/inv1</sup> forelimbs. Differences above random background are shown in red and blue. **d**, A representative 3D structure of the locus in *Pitx1*<sup>inv1/inv1</sup> forelimbs, selected from the ensemble of 'single-cell' model-derived conformations (Methods). In Fig. 6e, the corresponding coarse-grained version is shown to highlight the position of genes and regulators.

**A**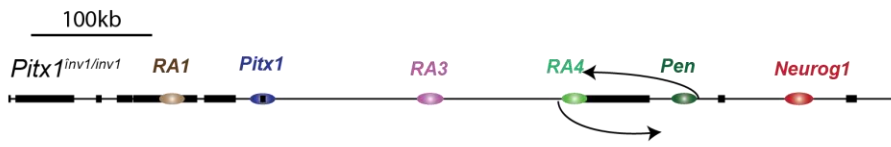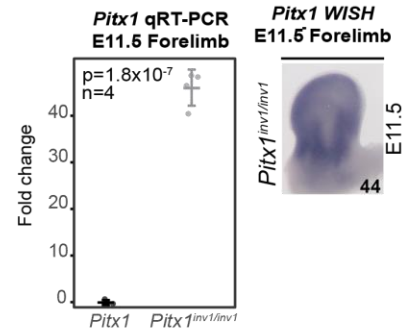**B**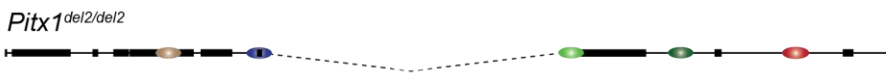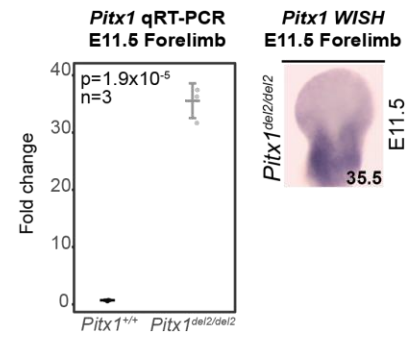**C**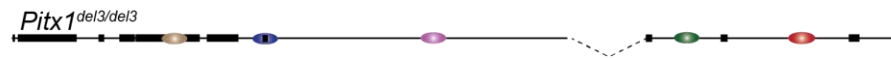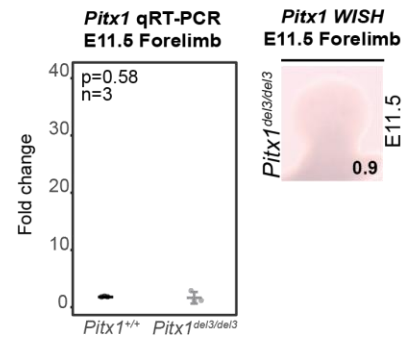**D**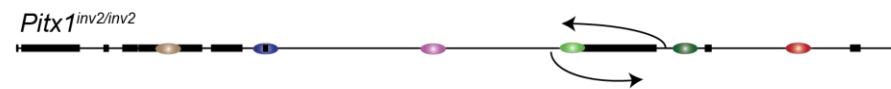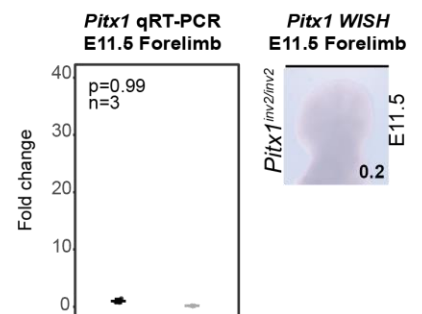**Supplementary Figure 10**Quantification of *Pitx1* forelimb transcription in several deletion and inversion mice.

WISH and qRT-PCR mRNA quantification of deletions and inversion at the *Pitx1* locus. In all analyses, we used a one-sided *t* test to evaluate the significance of increased *Pitx1* expression and *n* represents the number of wild-type and mutant forelimb pairs assayed. The s.d. is displayed as error bars and the measure of the center corresponds to the average. **a**, WISH and qRT-PCR mRNA quantification of E11.5 *Pitx1*<sup>inv1/inv1</sup> forelimbs ( $P = 1.8 \times 10^{-7}$ ,  $n = 4$ ). **b**, WISH and qRT-PCR mRNA quantification of E11.5 *Pitx1*<sup>del2/del2</sup> forelimbs ( $P = 1.9 \times 10^{-5}$ ,  $n = 3$ ). **c**, WISH and qRT-PCR mRNA quantification of E11.5 *Pitx1*<sup>del3/del3</sup> forelimbs ( $P = 0.58$ ,  $n = 3$ ). **d**, WISH and qRT-PCR mRNA quantification of E11.5 *Pitx1*<sup>inv2/inv2</sup> forelimbs ( $P = 0.99$ ,  $n = 3$ ).

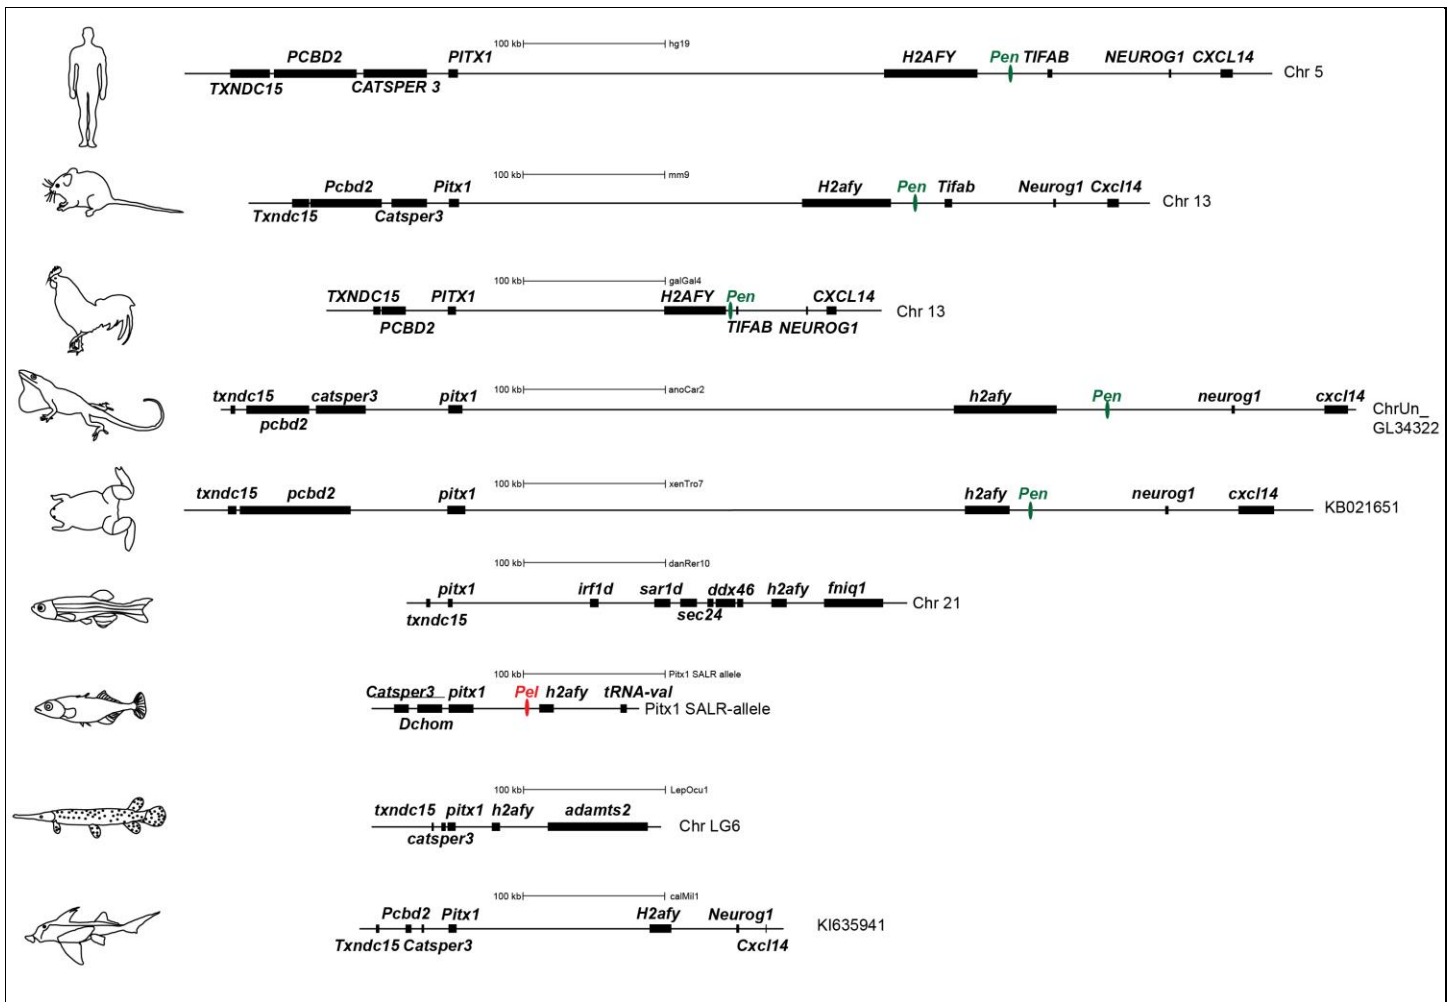

## Supplementary Figure 11

### Schematic representation of the *Pitx1* locus in several species.

Schematic representation of the *Pitx1* extended locus in several species, demonstrating the conserved synteny of the region. The species from top to bottom are human (*Homo sapiens*), mouse (*Mus musculus*), chicken (*Gallus gallus*), lizard (*Anolis carolinensis*), frog (*Xenopus (Silurana) tropicalis*), zebrafish (*Danio rerio*), stickleback (*Gasterosteus aculeatus*), spotted gar (*Lepisosteus oculatus*), and elephant shark (*Callorhynchus milii*). *Pen* (green) is found in tetrapods but not in fish. The previously characterized pelvic enhancer *Pel* (red) is displayed in red in stickleback.

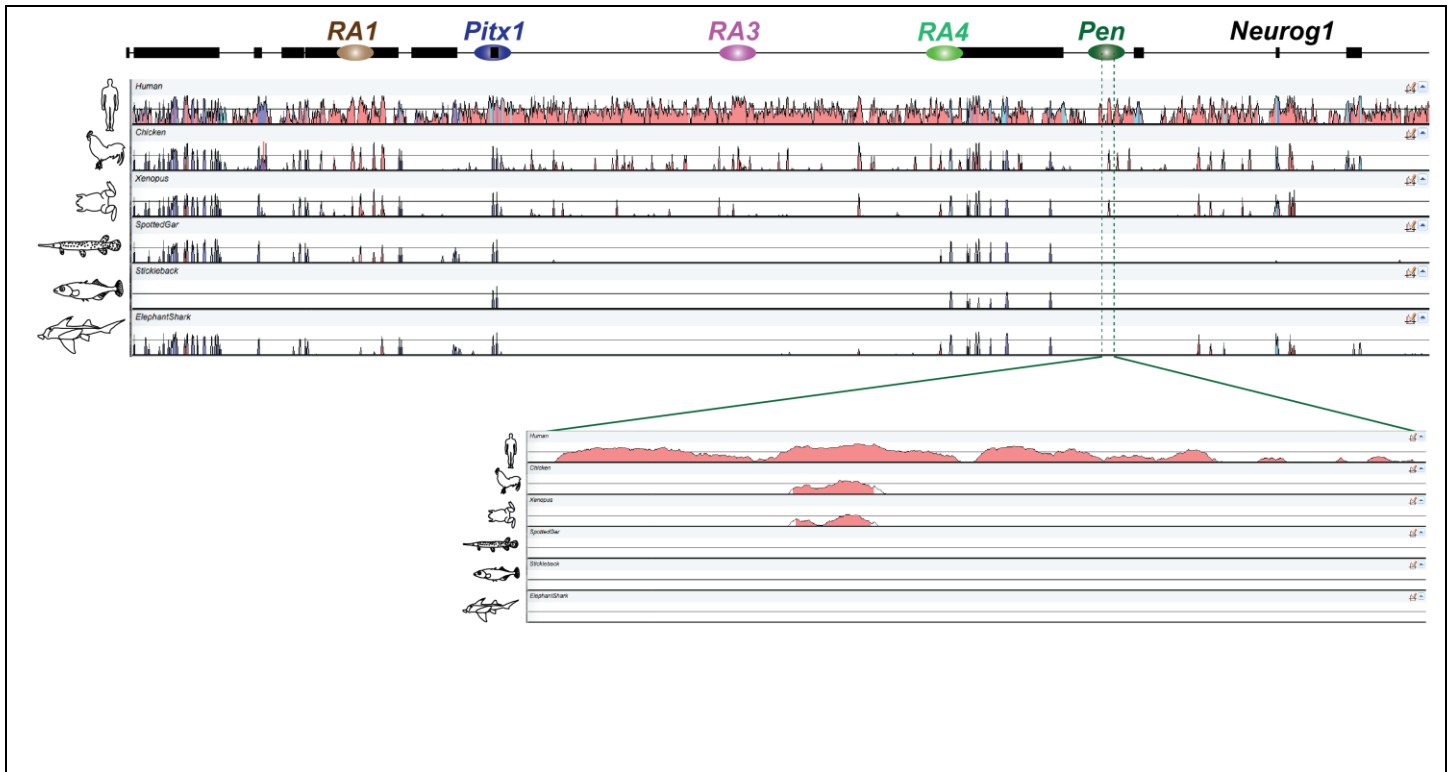

## Supplementary Figure 12

### Conservation of sequences between vertebrates along the *Pitx1* regulatory landscape.

Conservation of sequences between vertebrates along the *Pitx1* regulatory landscape. A zoomed-in view of the *Pen* region shows that the element is conserved with human (*Homo sapiens*), chicken (*Gallus gallus*), and frog (*Xenopus (Silurana) tropicalis*), but not with bony or cartilaginous fishes (here stickleback (*Gasterosteus aculeatus*), spotted gar (*Lepisosteus oculatus*), and elephant shark (*Callorhynchus milii*)).
